# Supplementary material
Source: publisher figshare collection journal article supplement (https://gsapubs.figshare.com/ndownloader/files/22398810)
Supplement: Supplementary file 1 [file 22398810]

## Sheet: Sheet1
Supplemental Table 2. Representative garnet trace element concentrations (ppm)*
	La	Ce	Pr	Nd	Sm	Eu	Gd	Tb	Dy	Ho	Er	Tm	Yb	Lu	Hf	V	Cr	Co	Y	Zr	Nb	Sc	Ti
Svarthopen pluton
N03.05, garnet biotite granite.
grain 1, rim	d.l.	0.0263322	0.0268807	0.722558	3.69853	0.131646	29.8752	12.744	145.379	36.4426	116.823	n.d.	109.141	13.8546	0.387059	37.6394	32.6883	18.6462	981.917	19.0664	0.00467994	n.d.	n.d.	ANU
grain 2, small crystal	d.l.	0.0189301	0.0177303	0.535853	3.27596	0.10149	23.2602	9.83465	122.337	34.2028	124.191	n.d.	134.366	17.4	0.274861	114.859	60.1202	10.5909	936.224	12.2846	0.0111011	n.d.	n.d.	ANU
N51.99f; gneissic garnet biotite granite.
grain 3, small grain	d.l.	0.0570811	0.0577374	1.03341	3.92086	0.11845	24.1791	10.0687	134.357	46.9742	215.408	n.d.	329.613	53.34	0.195079	131.379	85.8078	11.99	1182.93	9.44421	d.l.	n.d.	n.d.	ANU
grain 1, small grain	d.l.	0.0467647	0.0406516	0.94993	4.00359	0.230114	29.888	11.9026	131.224	32.8339	104.703	n.d.	96.2081	12.9217	0.168155	45.1977	19.2338	11.7848	848.867	7.55049	d.l.	n.d.	n.d.	ANU
grain 2, small grain	d.l.	0.076524	0.0780269	1.73952	7.55008	0.262809	45.9818	17.0122	185.041	51.1785	189.037	n.d.	221.128	30.443	0.969929	131.943	30.451	7.88294	1316.76	49.9715	0.0167924	n.d.	n.d.	ANU
N55.99c, garnet biotite tonalite.
grain 1, rim	0.0629396	0.168347	0.0315856	0.603909	4.3987	1.544	43.2873	15.8275	160.297	36.6443	113.887	n.d.	106.458	13.1363	0.0365406	67.2367	13.83	9.31053	1059.9	2.27557	0.0630121	n.d.	n.d.	ANU
grain 2, core	0.253407	0.58669	0.103436	1.31636	7.92706	2.35436	54.9267	15.12	118.445	21.8875	59.1865	n.d.	47.6616	5.19955	0.0806359	79.3945	12.2608	11.4531	698.081	4.5067	0.0653072	n.d.	n.d.	ANU
grain 2, rim	d.l.	0.0303908	0.0381881	0.508596	2.60012	0.0946522	19.2231	7.44507	79.4488	19.1005	60.2168	n.d.	54.3063	7.39978	0.300431	33.6233	38.0621	14.3015	496.257	13.4047	d.l.	n.d.	n.d.	ANU
grain 2, core	d.l.	0.0358964	0.0362491	0.855088	3.93084	0.196468	25.9689	9.63847	95.8642	21.7431	65.1978	n.d.	56.4861	7.61987	0.358087	40.7481	47.9447	14.5626	563.283	15.7396	d.l.	n.d.	n.d.	ANU
grain 3, small grain	0.0161023	0.068036	0.0343202	0.79209	3.72819	0.18579	27.3579	10.0957	99.9197	23.3044	70.2689	9.88463	64.8296	8.8947	0.397149	45.541	54.6894	13.2708	593.642	18.1926	6.62389	n.d.	n.d.	ANU
N57.99A, porphyroclastic garnet amphibole biotite tonalite.
grain 1 rim	0.0605607	0.187072	0.0326306	0.268882	0.870132	0.719347	6.76054	2.07009	18.7253	4.50138	15.7225	n.d.	23.4615	3.971	0.034359	70.032	36.2209	12.9867	121.518	2.00156	0.0262092	82.7244	509.741	TTU
grain 2 core	0.054974	0.124175	0.0329049	0.488113	3.07051	0.278738	31.8771	17.0696	240.581	76.2246	302.197	n.d.	371.449	52.0712	0.349194	50.7767	37.1057	17.5397	1951.21	14.255	0.00496764	109.664	38.7118	TTU
grain 2 rim	0.0521895	0.125614	0.0259607	0.559621	2.37645	1.7875	6.81848	1.16376	7.25095	1.26012	3.55946	n.d.	3.64697	0.514291	0.069361	36.4331	2.70738	12.0833	32.5662	2.1434	0.193292	69.9364	370.242	TTU
grain 3 core	d.l.	0.01787	0.0205658	0.469014	2.41543	0.353175	27.584	15.9295	267.78	104.505	499.755	n.d.	823.26	134.91	0.0345233	94.4218	91.9778	17.2417	2504.27	0.765384	d.l.	104.703	64.8103	TTU
grain 3 rim	0.10113	0.215056	0.026716	0.249143	1.02359	0.78859	8.35381	2.30455	17.0656	3.1592	8.92293	n.d.	9.42748	1.38172	0.0408497	105.177	84.3845	13.4408	92.2556	1.93392	0.0365959	70.2938	680.547	TTU
N132.00, garnet amphibole biotite tonalite.												n.d.
grain 3, rim	d.l.	0.00690906	0.00363874	0.125862	1.08175	1.62339	7.81437	2.27207	21.382	5.04571	18.027	n.d.	23.3618	3.47195	0.0468295	130.327	40.0349	14.4614	141.126	2.28511	0.0296785	53.3993	505.054	TTU
grain 4, rim	d.l.	d.l.	d.l.	0.133476	1.08268	1.8447	7.33346	2.09882	19.2549	4.51332	15.5307	n.d.	19.3753	2.87541	0.0492175	122.041	106.569	14.0212	130.408	2.59637	0.0259734	39.0993	532.625	TTU
grain 4, mantle	0.0598936	0.178316	0.0245626	0.201538	1.08097	1.795	5.9544	1.48311	12.1481	2.66214	8.41074	n.d.	8.71107	1.17402	0.0380755	131.189	107.156	14.3219	75.3991	2.7679	0.0384088	46.5006	548.585	TTU
eastern margin, stage 1, Hillstadfjellet pluton
91.10A, garnet biotite hornblende quartz diorite.
grain 1, rim	d.l.	d.l.	0.00756076	0.340852	2.02905	2.60885	9.31886	2.2975	19.0975	4.56271	15.5561	2.61022	20.5105	3.26077	0.0748012	90.7243	16.4379	13.8811	121.976	4.09439	0.0174274	48.2974	737.347	TTU
grain 1, rim	d.l.	0.00589194	0.00896591	0.263071	1.64475	2.38093	6.49729	1.25653	8.13386	1.49883	4.00544	0.564899	3.74604	0.521482	0.0587863	110.195	77.3728	14.6817	42.3618	2.96008	0.0138545	42.1275	613.563	TTU
grain 1, core	0.00442888	0.00546538	0.00998208	0.28384	1.61677	2.41571	6.07613	1.2288	7.57874	1.29531	3.43621	0.495063	3.64095	0.520142	0.0849036	106.547	104.526	14.35	36.4328	3.66493	0.0220392	67.0455	787.918	TTU
91.30, garnet hornblende biotite quartz diorite.
grain 1, core	d.l.	0.0739862	0.0719895	1.75762	7.09706	0.608429	25.0016	5.35505	32.037	4.72915	10.1876	1.17964	6.82039	0.76014	0.482155	14.4139	3.69031	22.7771	136.683	11.8721	0.0106233	36.5573	73.7399	TTU
grain 1, rim	0.00492191	0.0505193	0.0454968	1.22937	5.00666	0.487462	31.7212	8.98366	63.2127	10.1762	21.747	2.36936	12.4842	1.59639	0.0588409	49.7125	25.0635	15.5044	280.677	3.17603	d.l.	87.5866	91.4172	TTU
grain 2, core	d.l.	0.0885239	0.0842614	1.64247	6.01879	0.493681	22.8892	5.15265	34.7952	6.18237	15.9755	2.10872	13.3529	1.73775	0.647428	16.428	d.l.	18.9518	162.846	21.1368	0.15325	30.2882	142.003	TTU
grain 2, rim	0.0258583	0.124614	0.0569351	1.22289	5.24293	0.918811	25.075	7.15284	54.0108	9.00076	19.4059	2.11209	11.5983	1.36907	0.142066	38.0903	6.39264	14.5697	242.678	5.3536	0.0192527	62.2942	101.883	TTU
grain 3, core	0.0178831	0.0838696	0.0689519	2.27721	12.5489	1.88948	92.5946	27.0597	178.339	23.6159	39.4084	3.49027	16.9308	1.79763	0.0888091	91.1332	59.1035	14.9577	679.43	3.11035	0.00964315	91.315	218.523	TTU
grain 3, rim	d.l.	0.0641266	0.0621796	1.99668	10.6755	5.123	60.606	15.3374	98.3091	14.5714	30.8358	3.28765	19.1082	2.57913	0.0478096	116.999	63.6717	11.1835	432.048	3.9721	0.00655835	75.1561	653.866	TTU
aureole of Sausfjellet pluton
N167.00, augite-bearing garnet amphibole quartz diorite.
grain 1, core	d.l.	d.l.	0.00502013	0.217812	0.79688	1.21046	4.03369	0.864474	5.58109	0.91661	2.35649	0.328603	2.68649	0.387556	0.0449803	179.613	182.303	n.d.	28.3663	2.16997	0.0136348	73.3931	534.389	TTU
grain 2, rim	0.00571315	0.0194825	0.00649507	0.170173	0.72777	1.88381	0.943579	0.1181	0.512402	0.0865843	0.219381	0.0475945	0.530892	0.0658617	0.0501237	246.187	150.527	n.d.	2.42934	2.40997	0.0134841	44.0466	545.792	TTU
grain 2, mantle	0.829694	2.48945	0.338248	1.70429	0.703204	2.36039	0.629988	0.0838252	0.446924	0.0795445	0.225039	0.0409087	0.251612	0.0622176	0.0410009	166.097	20.6193	n.d.	1.90698	2.16829	0.0373697	57.4199	409.945	TTU
grain 3, rim	d.l.	d.l.	0.00626185	0.124902	0.512431	2.50106	1.78409	0.445253	3.10937	0.626522	1.87044	0.311054	2.46085	0.355466	0.0364915	123.686	185.73	n.d.	17.7506	2.57837	0.0136395	25.3959	536.465	TTU
aureole of Akset-Drevli pluton
N155.00, garnet biotite tonalite
grain 1, rim	d.l.	0.00654229	0.00790165	0.139406	0.931885	0.59627	11.0207	5.58129	60.5567	14.224	43.0812	5.92538	36.583	4.76055	0.0719586	14.9124	81.0806	21.2375	377.411	3.80486	bdl	227.215	47.5706	TTU
grain 1, core	0.934241	1.79174	0.142389	0.621297	2.4036	0.24124	22.2164	6.2314	46.1208	8.15989	21.2085	2.9303	19.3413	2.38125	1.26678	35.7967	42.9223	25.3954	253.316	63.7213	0.0555083	160.673	119.158	TTU
grain 2, mantle	0.00421626	0.0189867	0.0225576	0.573046	2.21948	0.226554	16.2725	6.48408	67.2211	15.8451	50.5198	7.20014	47.1725	5.80047	0.217673	27.3593	103.623	24.8353	476.096	10.8613	bdl	178.486	64.1596	TTU
grain 2, rim	d.l.	0.0415409	0.0207133	0.389369	1.97171	0.523666	20.654	10.1834	136.652	46.8151	201.351	36.368	281.823	46.2167	0.354992	24.0011	128.79	20.9769	1131.47	14.3394	bdl	227.898	81.2322	TTU
grain 3, rim	0.0286005	0.0568106	0.00841242	0.156157	0.883565	0.52423	11.7911	6.8585	88.6029	25.2492	88.7798	13.0342	83.5806	11.75	0.0490522	19.2705	92.0222	21.9323	657.63	3.10448	bdl	196.997	49.5161	TTU
grain 3, mantle	d.l.	0.0616245	0.0717469	1.35047	5.32749	0.456914	24.4865	6.55522	53.8704	11.6287	35.4173	4.82749	31.2954	4.00427	0.55733	41.0865	148.275	26.4549	320.472	31.1149	bdl	187.167	212.732	TTU
* Analyses by laser-ablation inductively-coupled plasma spectrometry at Australia National University and Texas Tech University.
At ANU, analysis used a 193 nm Excimer laser and Agilent 7500S inductively-coupled plasma quadrupole mass spectrometer (ICP-MS)
At TTU, analysis used a 213 nm solid-state laser and Agilent 7500cs ICP-MS
Spot size nominally 30–40 μm; standardized to NIST 612 glass
d.l., below detection limits; n.d., not determined
